# Supplementary material for: Network-based stratification analysis of 13 major cancer types using mutations in panels of cancer genes
Source: PubMed Central journal article supplement (PMC4474538; doi:10.1186/1471-2164-16-s7-s7), 2015-06-11
Supplement: 1471-2164-16-S7-S7-S1.pdf [file 1471-2164-16-S7-S7-S1.pdf]

**Table S1:** Sample sizes of 21 tumor types before and after filtering to ensure sufficient mutations per sample.

| Cancer <sup>a</sup> | Sample size | Full (# mutations ≥ 6) | FoundationOne (# mutations ≥ 1) | PanCan (# mutations ≥ 1) | TrueSeq (# mutations ≥ 1) |
|---------------------|-------------|------------------------|---------------------------------|--------------------------|---------------------------|
| BLCA                | 99          | 99 (100%)              | 97(98%)                         | 95 (96%)                 | 84 (85%)                  |
| BRCA                | 887         | 849 (96%)              | 661 (75%)                       | 647 (73%)                | 528 (60%)                 |
| CARC*               | 54          | 53 (98%)               | 26 (48%)                        | 13 (24%)                 | 10 (19%)                  |
| CLL*                | 158         | 135 (85%)              | 79 (50%)                        | 66 (42%)                 | 34 (22%)                  |
| CRC                 | 233         | 233 (100%)             | 227 (97%)                       | 226 (97%)                | 219 (94%)                 |
| DLBC*               | 57          | 55 (96%)               | 51 (89%)                        | 43 (75%)                 | 31 (54%)                  |
| ESO                 | 140         | 140 (100%)             | 133 (95%)                       | 125 (89%)                | 112 (80%)                 |
| GBM                 | 291         | 288 (99%)              | 247 (85%)                       | 237 (81%)                | 199 (68%)                 |
| HNSC                | 384         | 372 (97%)              | 357 (93%)                       | 347 (90%)                | 303 (79%)                 |
| KIRC                | 417         | 414 (99%)              | 328 (79%)                       | 310 (74%)                | 220 (53%)                 |
| LAML*               | 194         | 126 (65%)              | 132 (68%)                       | 131 (68%)                | 77 (40%)                  |
| LUAD                | 398         | 391 (98%)              | 372 (93%)                       | 359 (90%)                | 322 (81%)                 |
| LUSC                | 176         | 176 (100%)             | 176 (100%)                      | 175 (99%)                | 158 (90%)                 |
| MED*                | 89          | 42 (47%)               | 26 (29%)                        | 24 (27%)                 | 15 (17%)                  |
| MEL                 | 118         | 118 (100%)             | 117 (99%)                       | 113 (96%)                | 112 (95%)                 |
| MM                  | 204         | 200 (98%)              | 157 (77%)                       | 146 (72%)                | 121(59%)                  |
| NB*                 | 75          | 18 (24.00%)            | 49 (65%)                        | 61 (81%)                 | 62 (83%)                  |
| OV                  | 316         | 313 (99%)              | 276 (87%)                       | 281 (89%)                | 238 (75%)                 |
| PRAD*               | 131         | 109 (83%)              | 51 (39%)                        | 45 (34%)                 | 19 (15%)                  |
| RHAB*               | 33          | 7 (21%)                | 10 (30%)                        | 4 (12%)                  | 8 (24%)                   |
| UCEC                | 247         | 247 (100%)             | 245 (99%)                       | 242 (98%)                | 229 (93%)                 |
| Total               | 4701        | 4008 <sup>†</sup>      |                                 |                          |                           |

\*Tumors excluded from NBS analysis due to insufficient mutations or samples

<sup>†</sup>Calculated after excluding tumor marked by \*

<sup>a</sup>BLCA-Bladder urothelial carcinoma; BRCA-Breast invasive carcinoma; CARC-Carcinoid; CLL-Chronic lymphocytic leukemia; CRC-Colorectal carcinoma; DLBC-Diffuse large B-cell lymphoma; ESO-Esophageal adenocarcinoma; GBM-Glioblastoma multiforme; HNSC-Head and neck squamous cell carcinoma; KIRC-Kidney renal clear cell carcinoma; LAML-Acute myeloid leukemia; LUAD-Lung adenocarcinoma; LUSC-Lung squamous cell carcinoma; MED-Medulloblastoma; MEL-Melanoma; MM-Multiple myeloma; OV-Ovarian serous cystadenocarcinoma; PRAD-Prostate adenocarcinoma; RHAB-Rhabdoid tumor; UCEC-Uterine corpus endometrial carcinoma

**BLCA**

K=3

K=4

K=5

K=6

Full

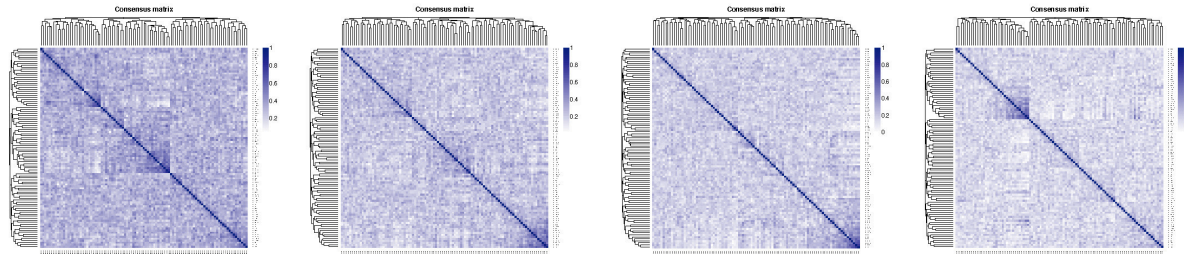

FoundationOne

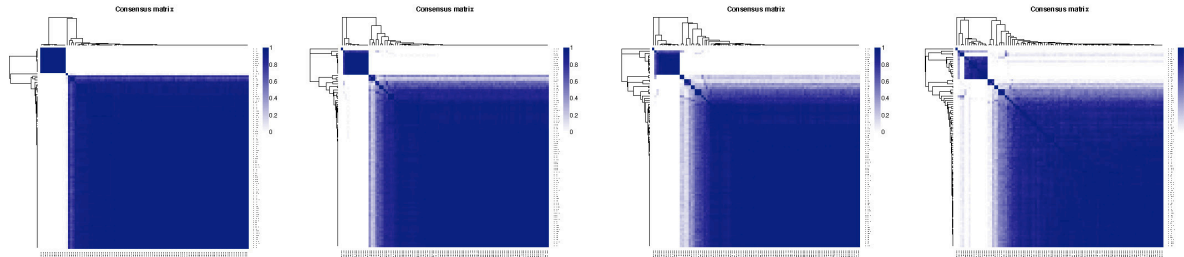

PanCan

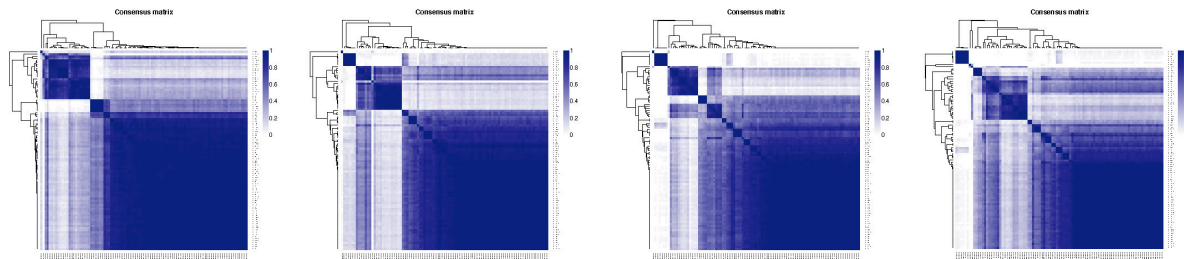

TrueSeq

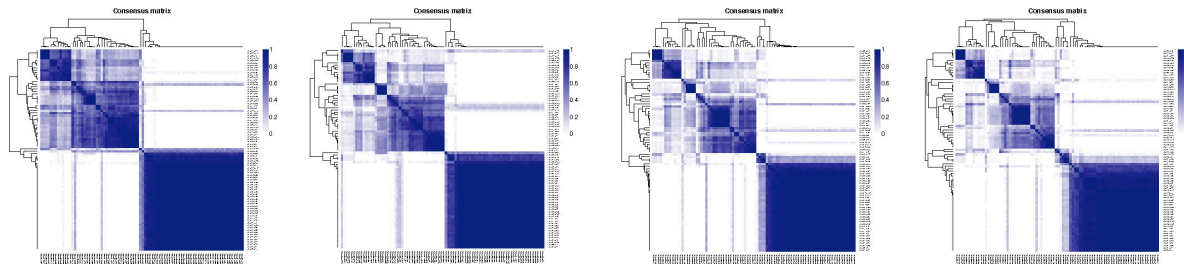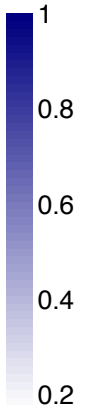

**Figure S1:** The clustering patterns of BLCA across the four gene sets (Full, FoundationOne, PanCan, and TrueSeq) and rank K=3,4,5,6.

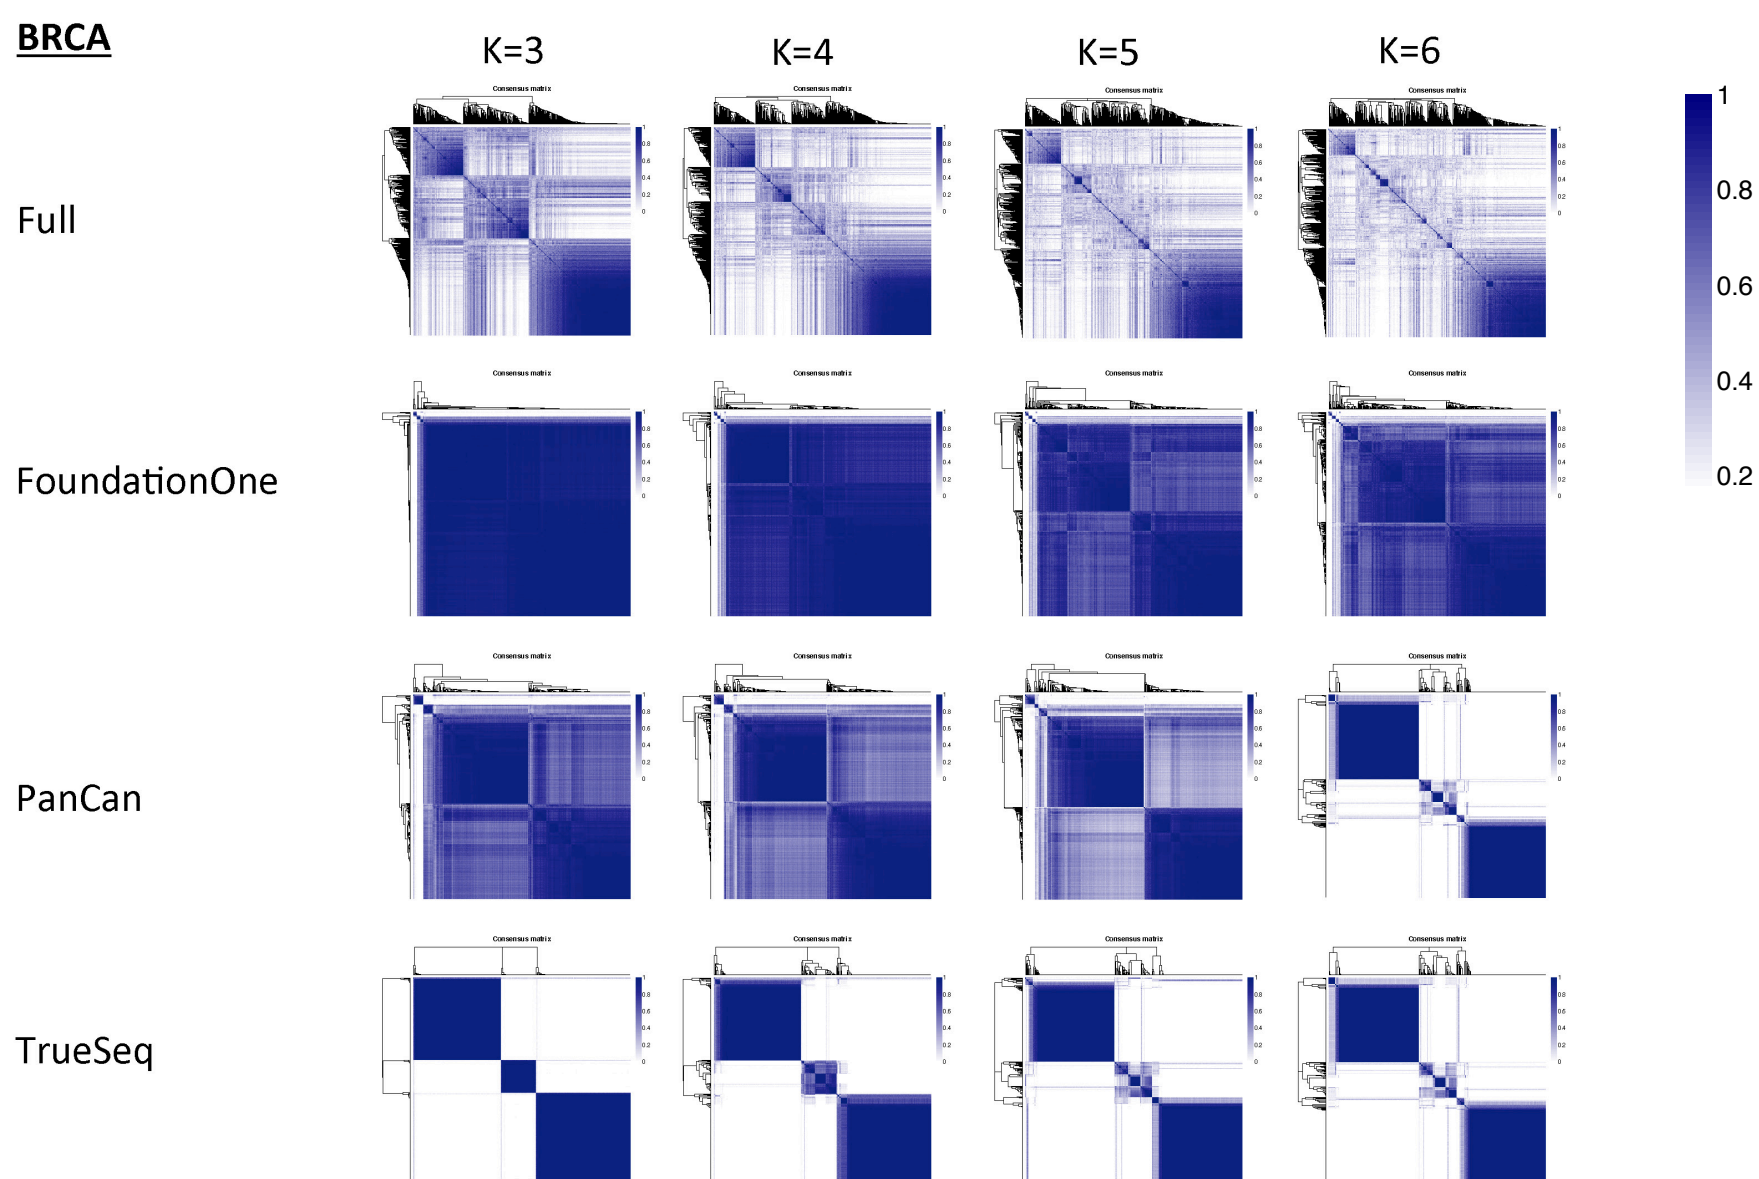

**Figure S2:** The clustering patterns of BRCA across the four gene sets (Full, FoundationOne, PanCan, and TrueSeq) and rank  $K=3,4,5,6$ .

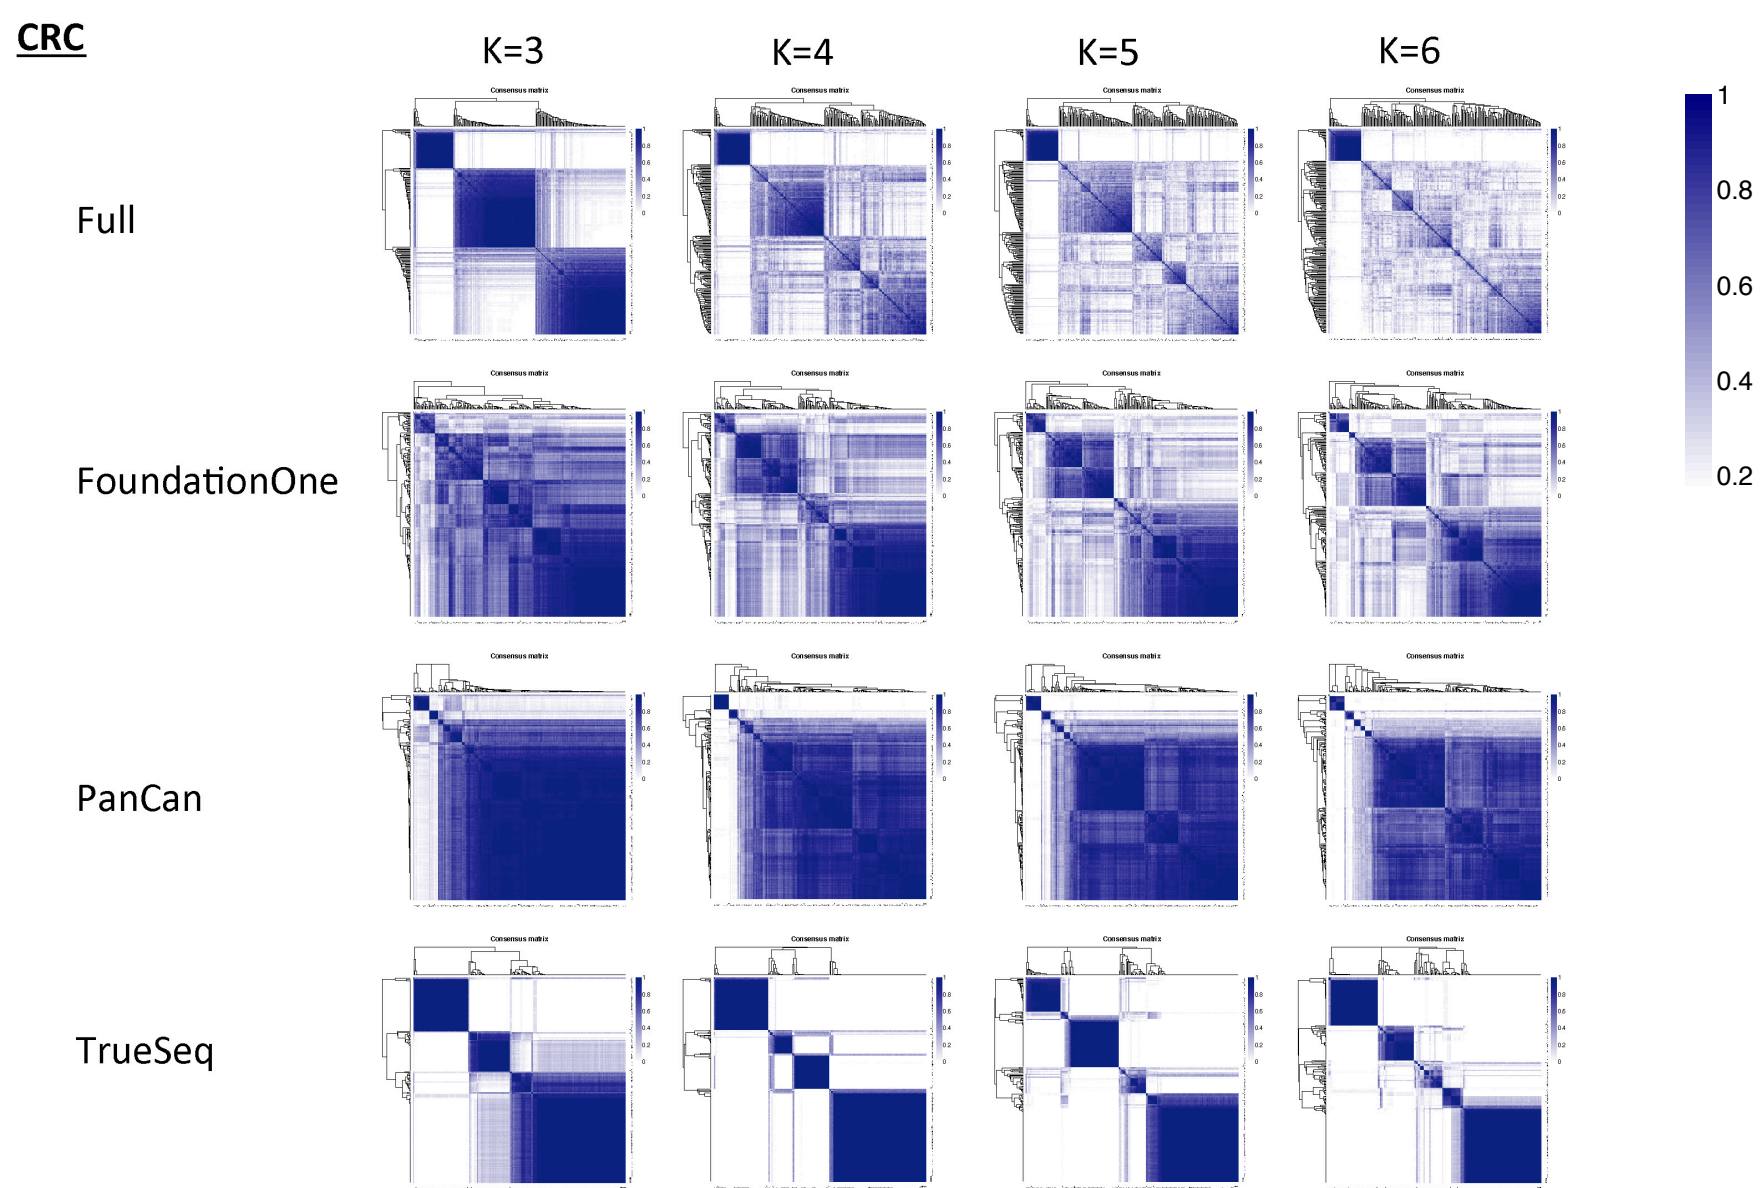

**Figure S3:** The clustering patterns of CRC across the four gene sets (Full, FoundationOne, PanCan, and TrueSeq) and rank K=3,4,5,6.

Full

K=3

K=4

K=5

K=6

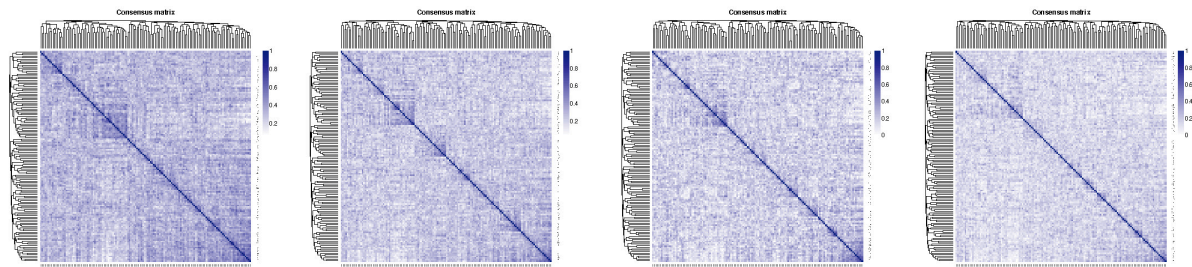

FoundationOne

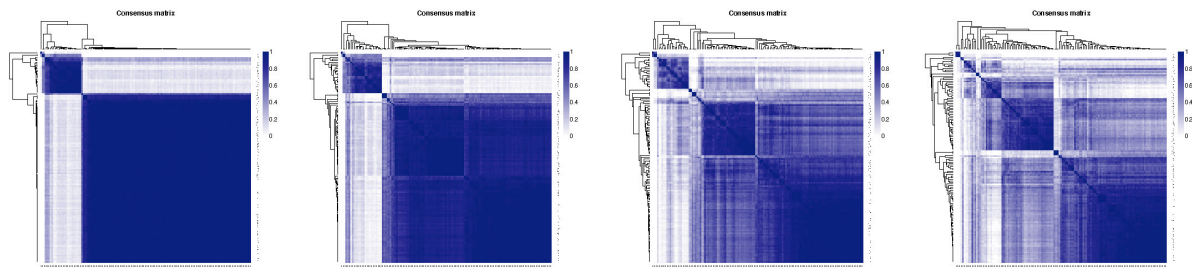

PanCan

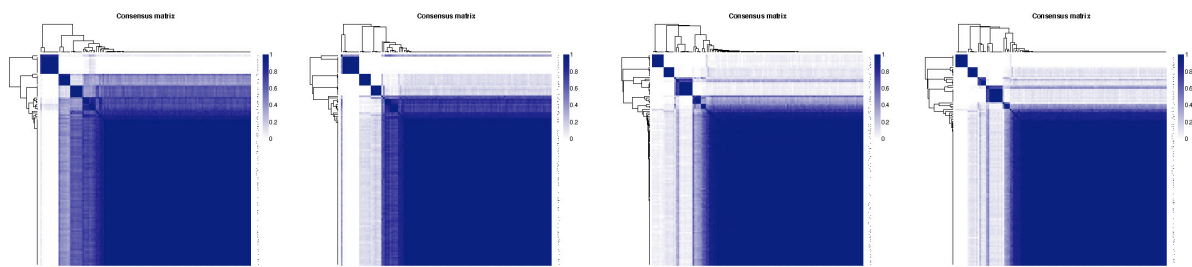

TrueSeq

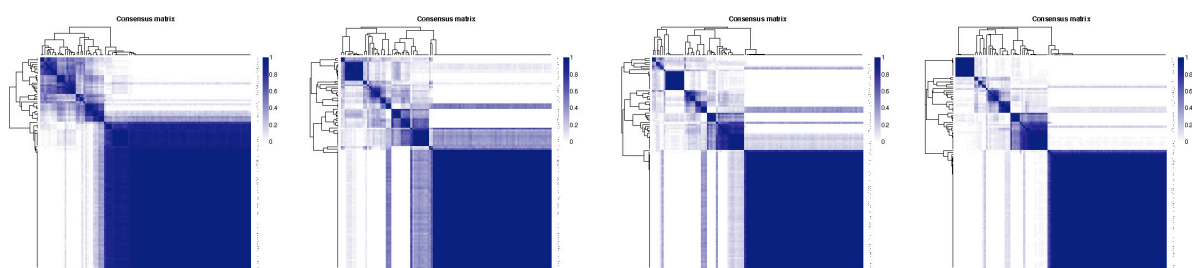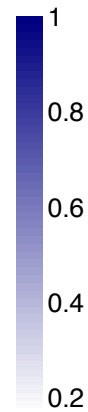

**Figure S4:** The clustering patterns of ESO across the four gene sets (Full, FoundationOne, PanCan, and TrueSeq) and rank K=3,4,5,6.

# GBM

K=3

K=4

K=5

K=6

Full

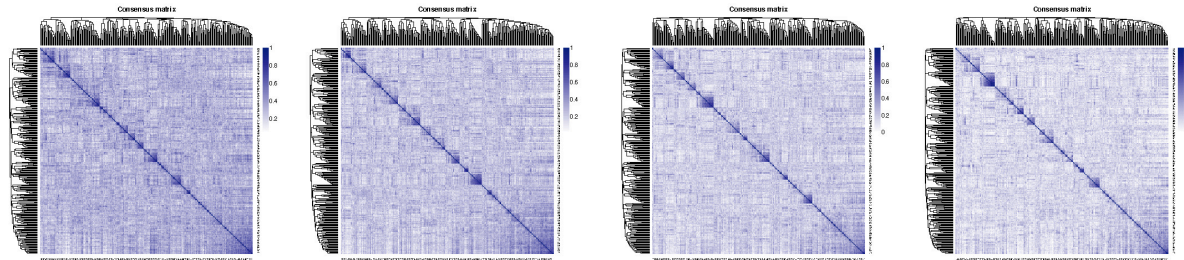

FoundationOne

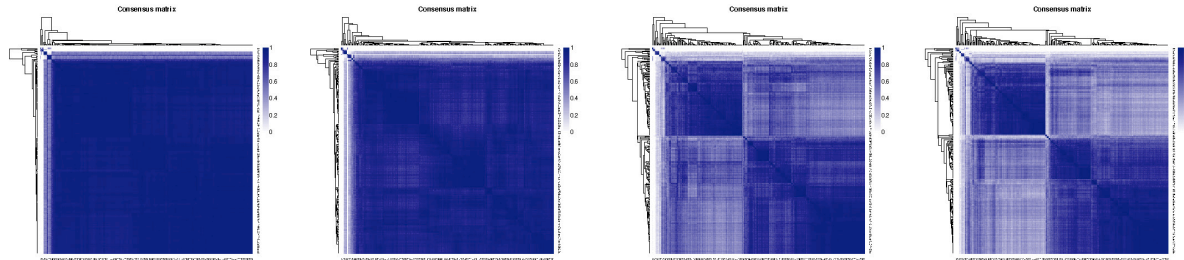

PanCan

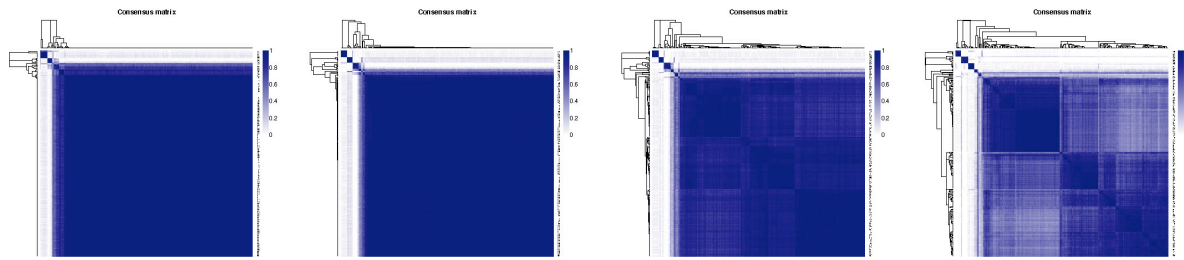

TrueSeq

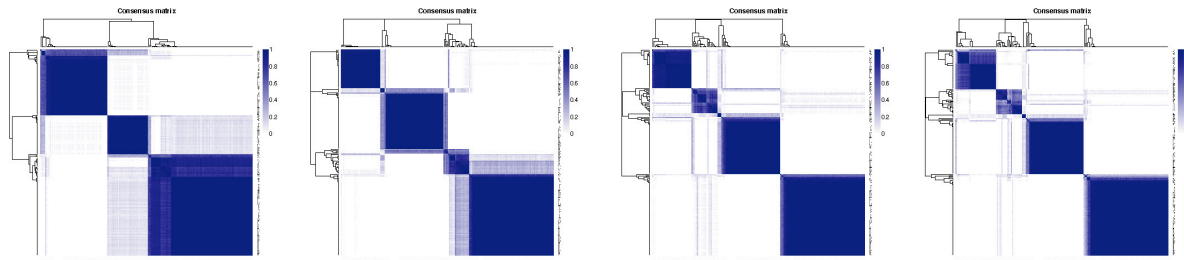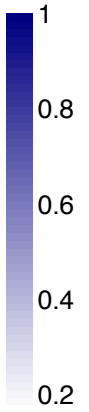

Figure S5: The clustering patterns of GBM across the four gene sets (Full, FoundationOne, PanCan, and TrueSeq) and rank K=3,4,5,6.

# HNSC

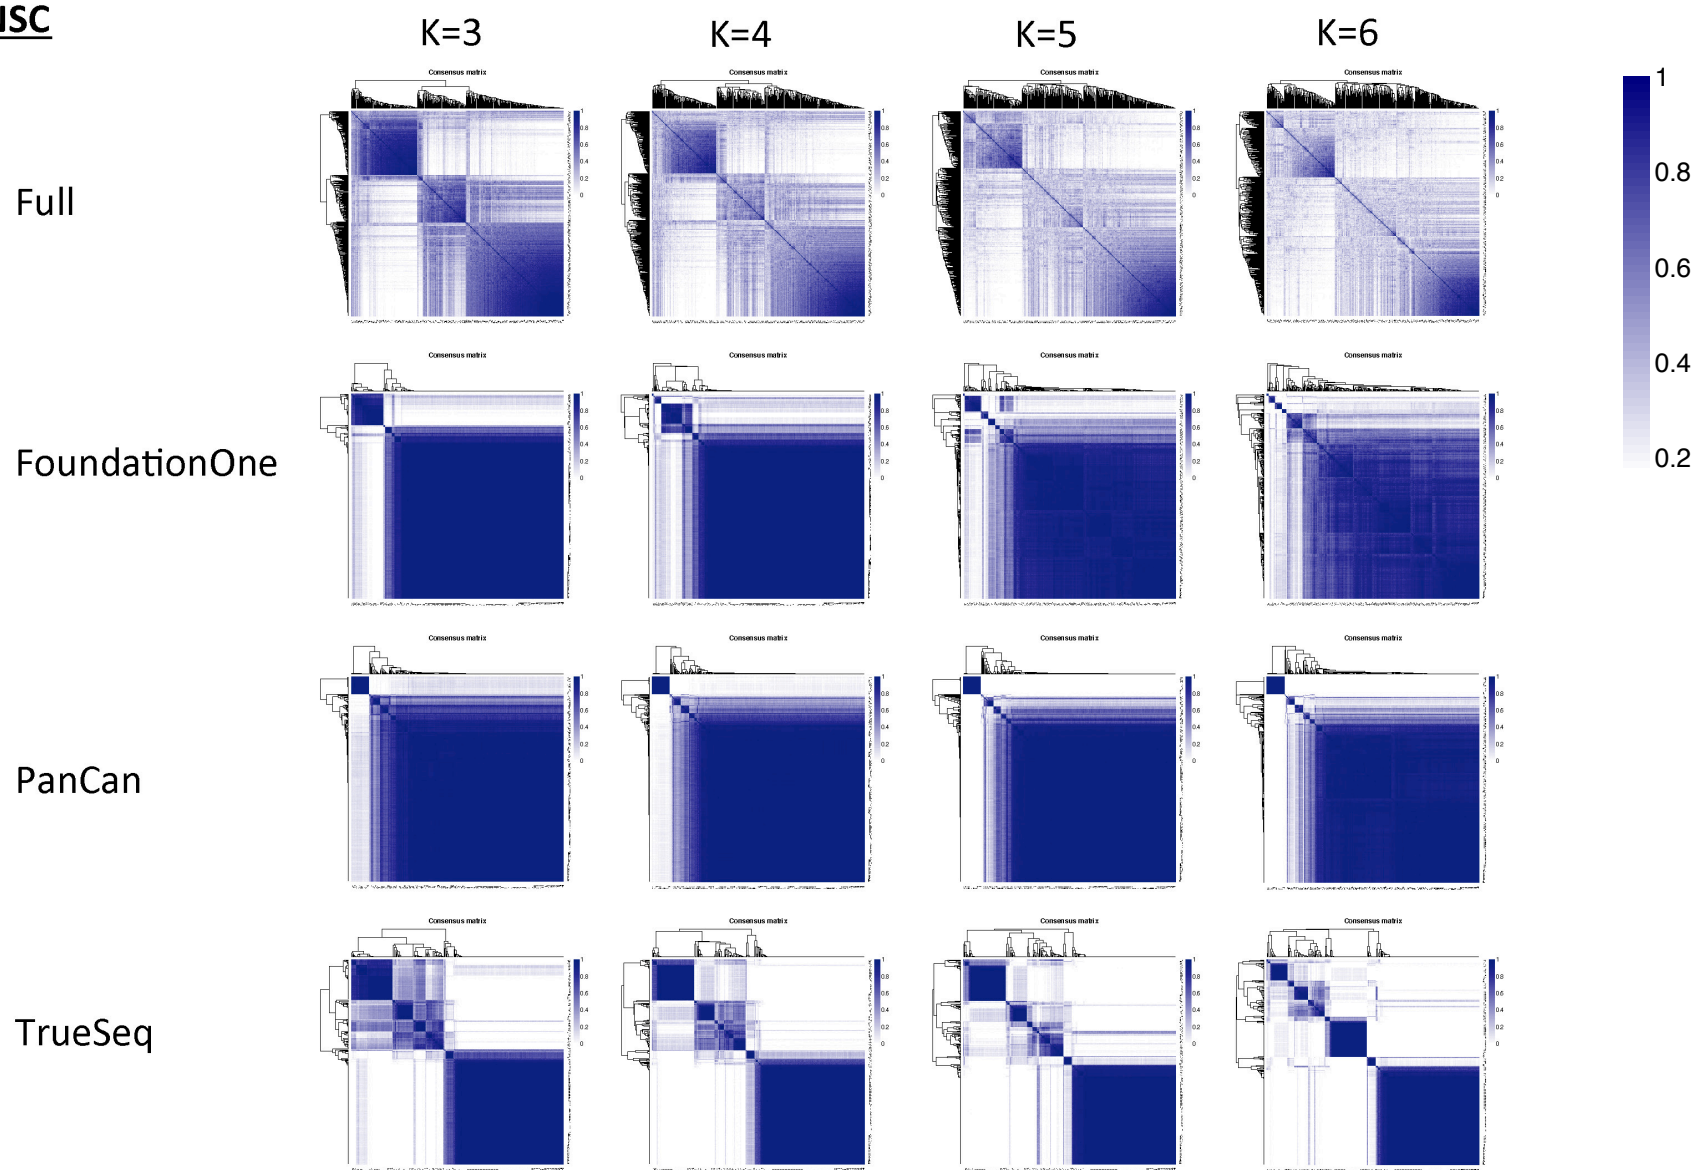

**Figure S6:** The clustering patterns of HNSC across the four gene sets (Full, FoundationOne, PanCan, and TrueSeq) and rank  $K=3,4,5,6$ .

# KIRC

Full

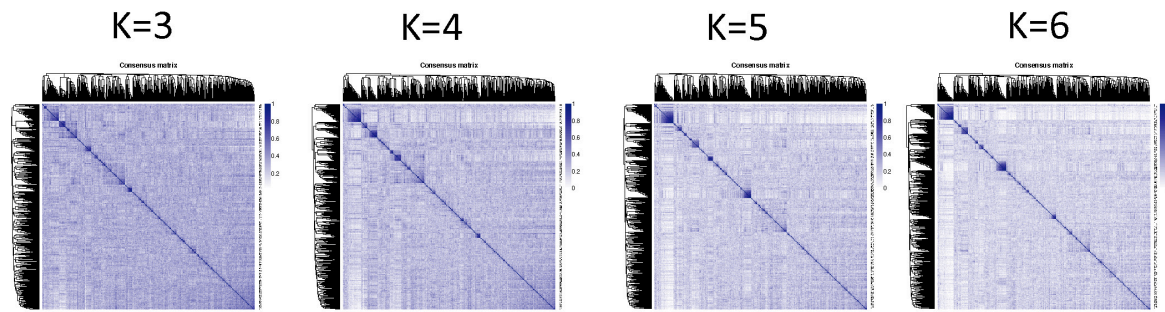

FoundationOne

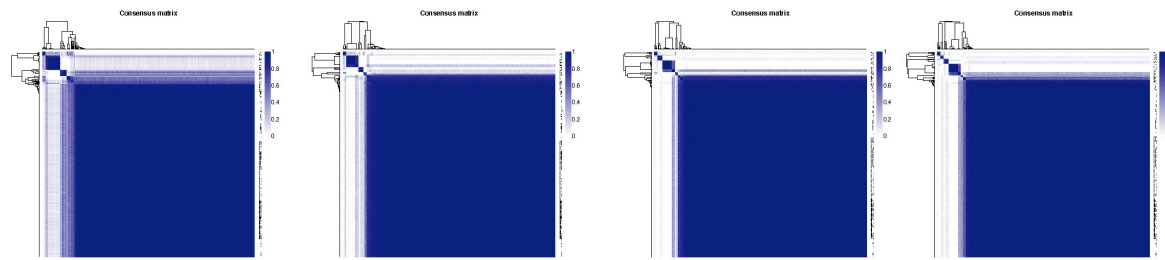

PanCan

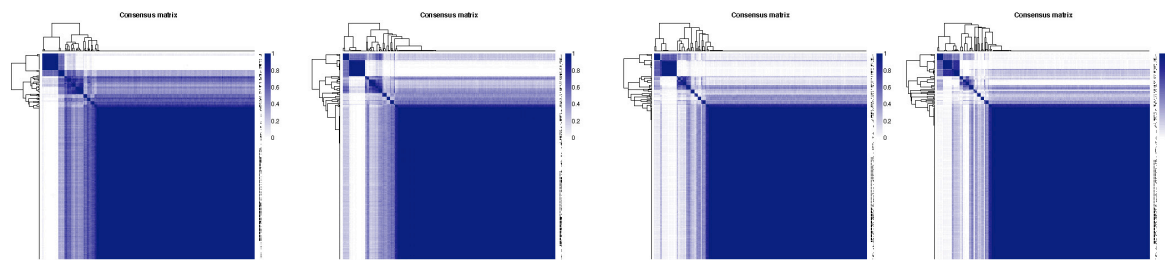

TrueSeq

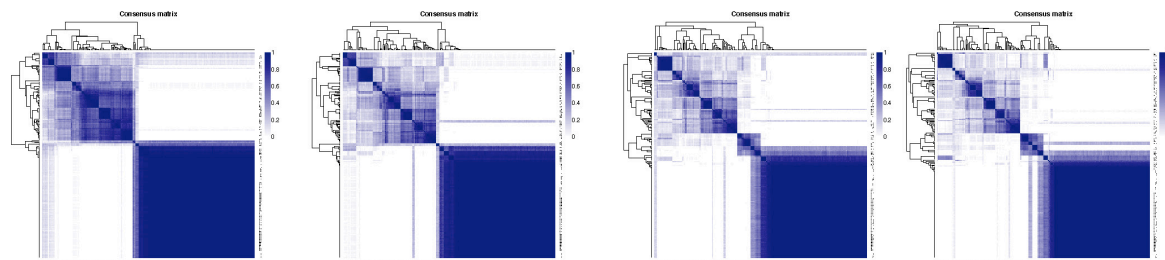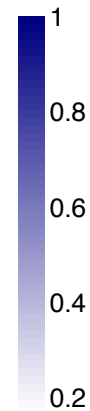

**Figure S7:** The clustering patterns of KIRC across the four gene sets (Full, FoundationOne, PanCan, and TrueSeq) and rank  $K=3,4,5,6$ .



# LUAD

K=3

K=4

K=5

K=6

Full

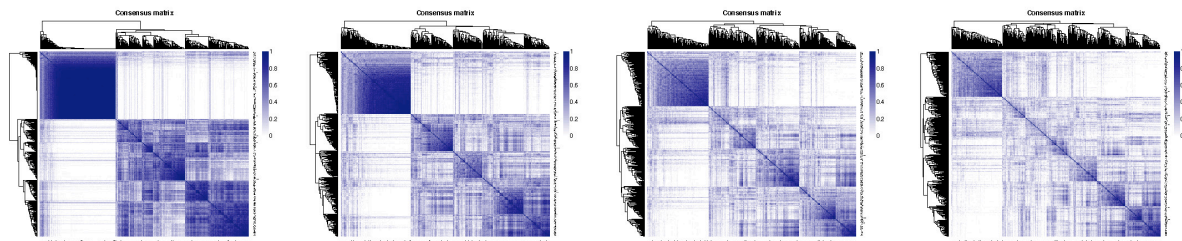

FoundationOne

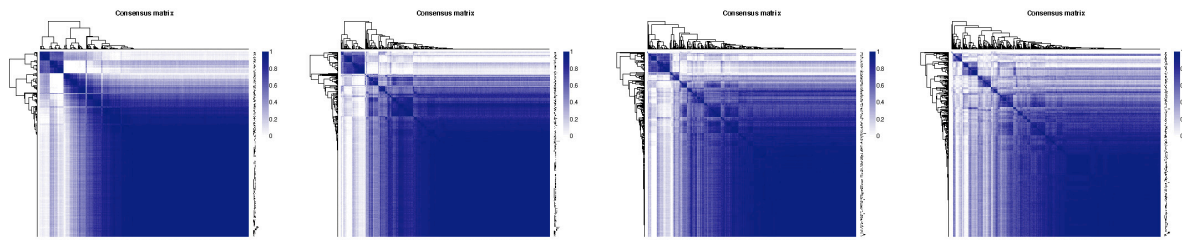

PanCan

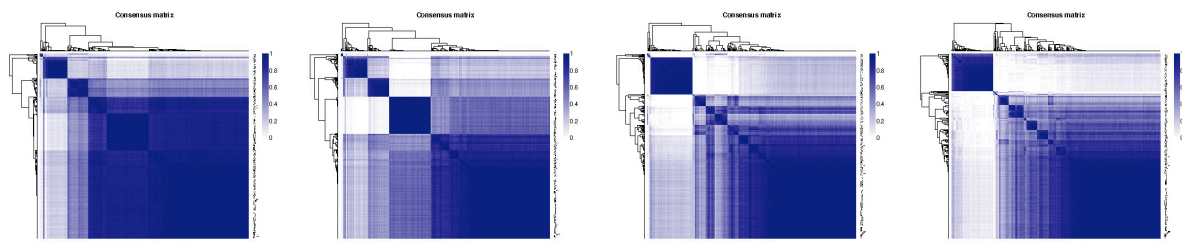

TrueSeq

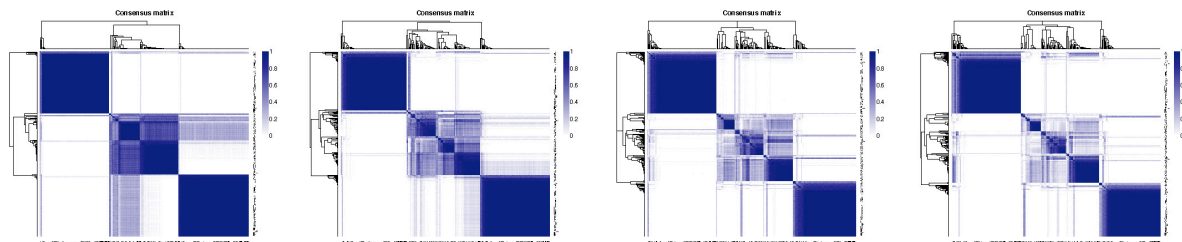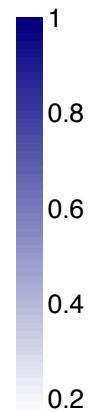

Figure S8: The clustering patterns of LUAD across the four gene sets (Full, FoundationOne, PanCan, and TrueSeq) and rank  $K=3,4,5,6$ .

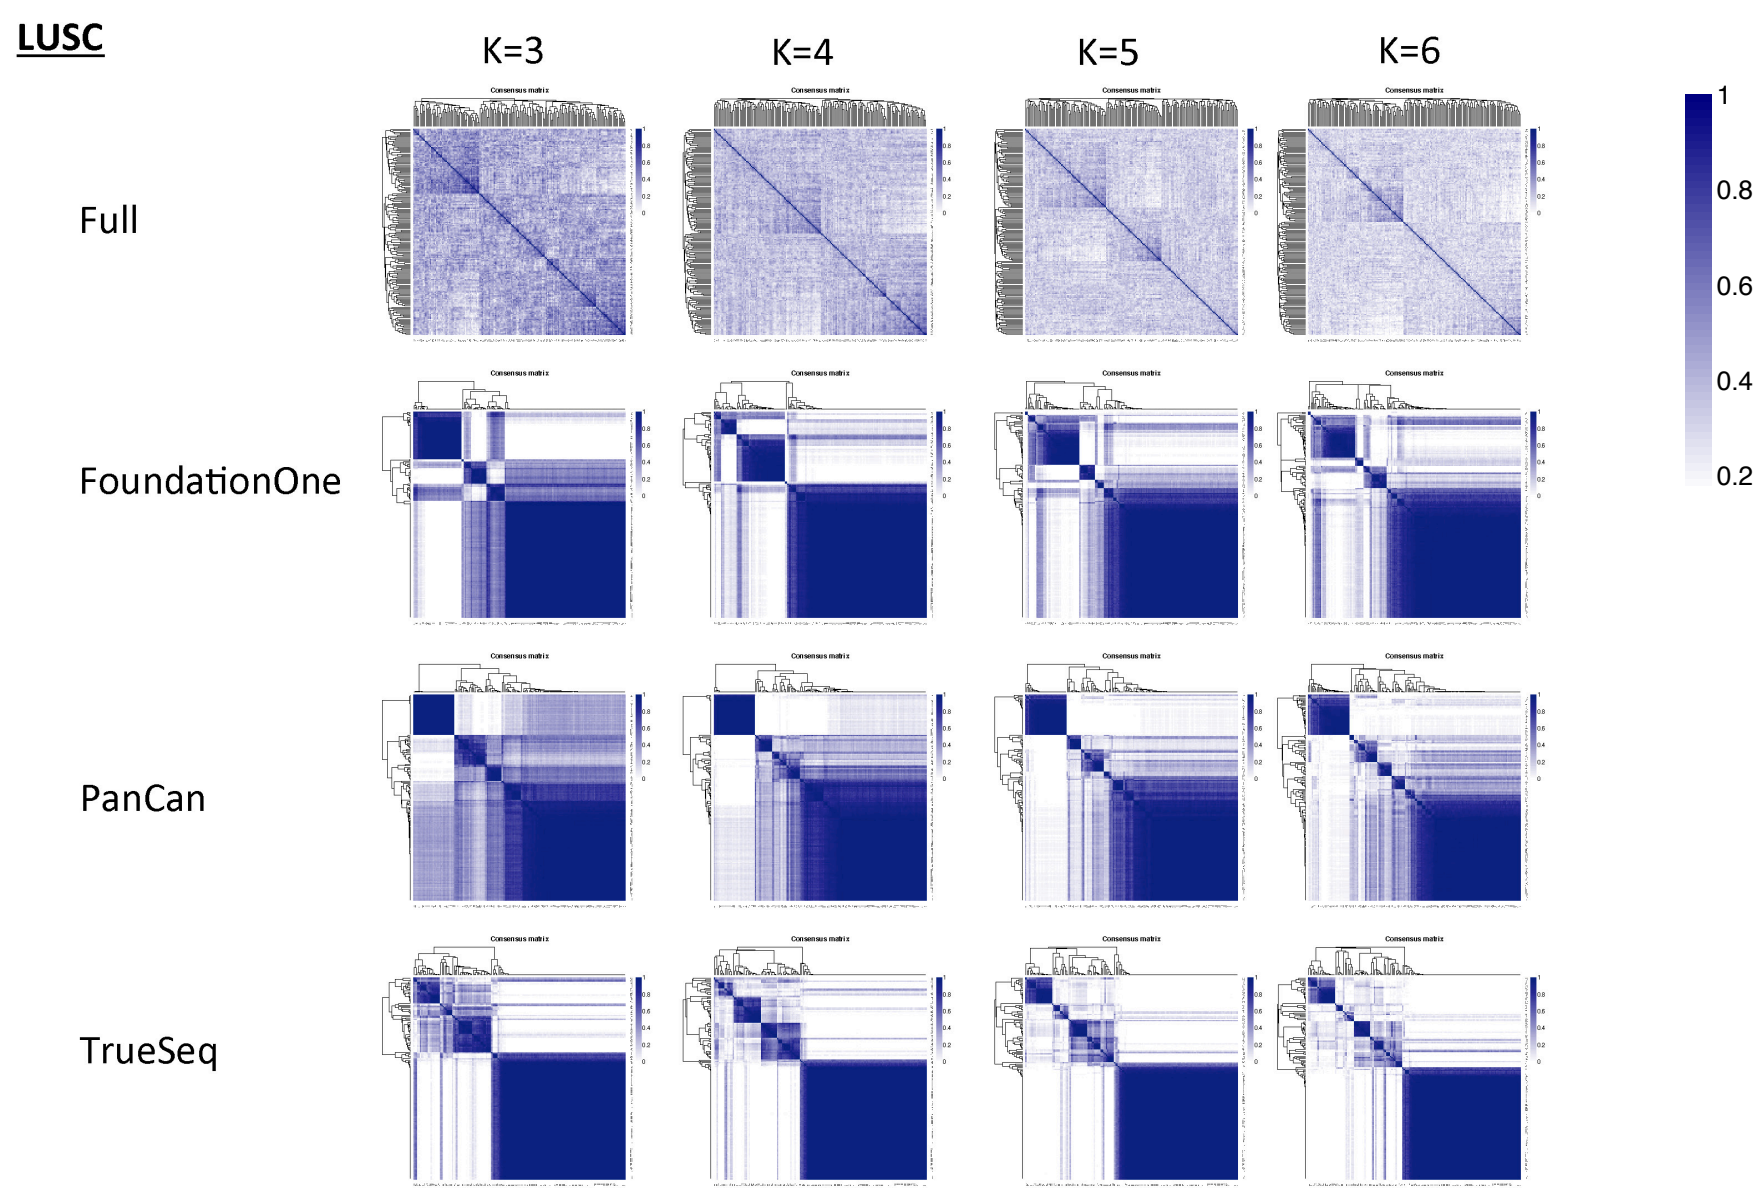

**Figure S9:** The clustering patterns of LUSC across the four gene sets (Full, FoundationOne, PanCan, and TrueSeq) and rank  $K=3,4,5,6$ .

**K=3****K=4****K=5****K=6**

Full

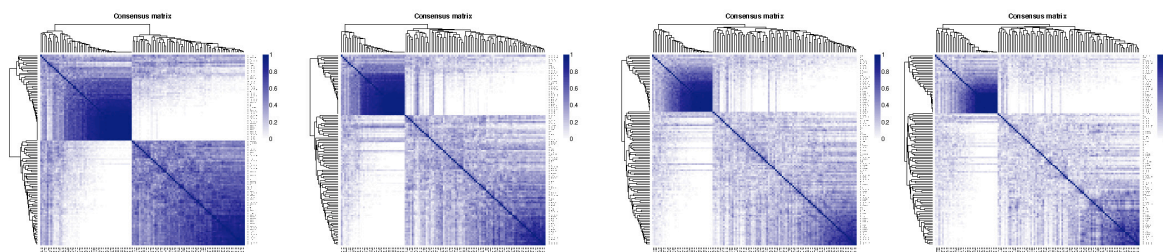

FoundationOne

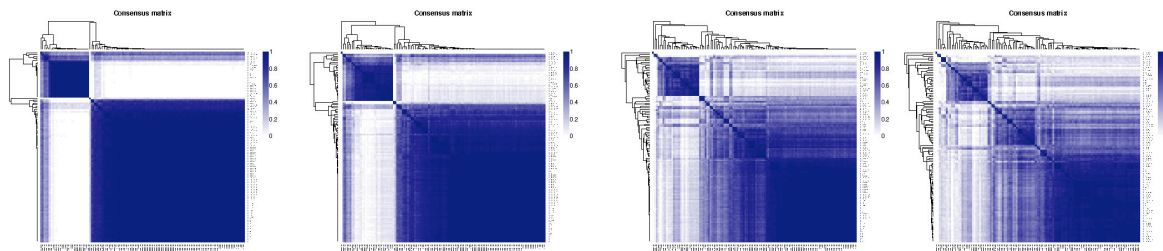

PanCan

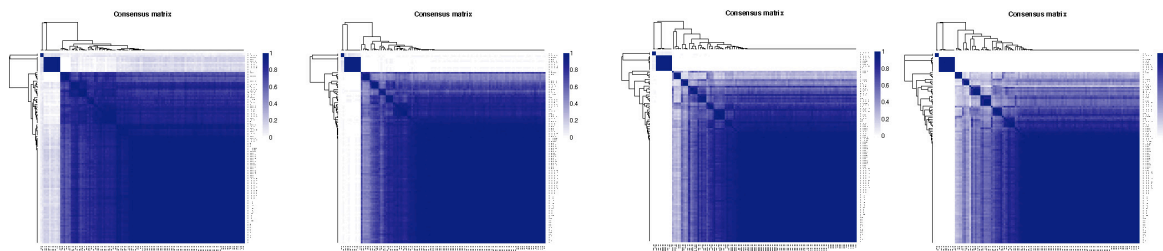

TrueSeq

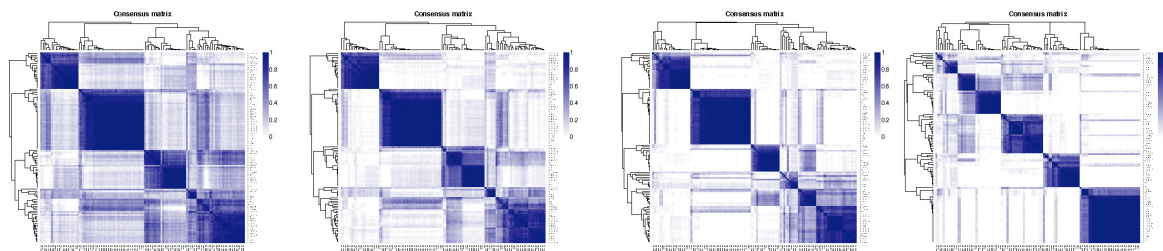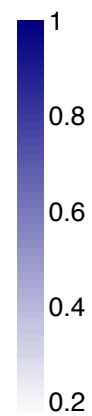

**Figure S10:** The clustering patterns of MEL across the four gene sets (Full, FoundationOne, PanCan, and TrueSeq) and rank  $K=3,4,5,6$ .

# MM

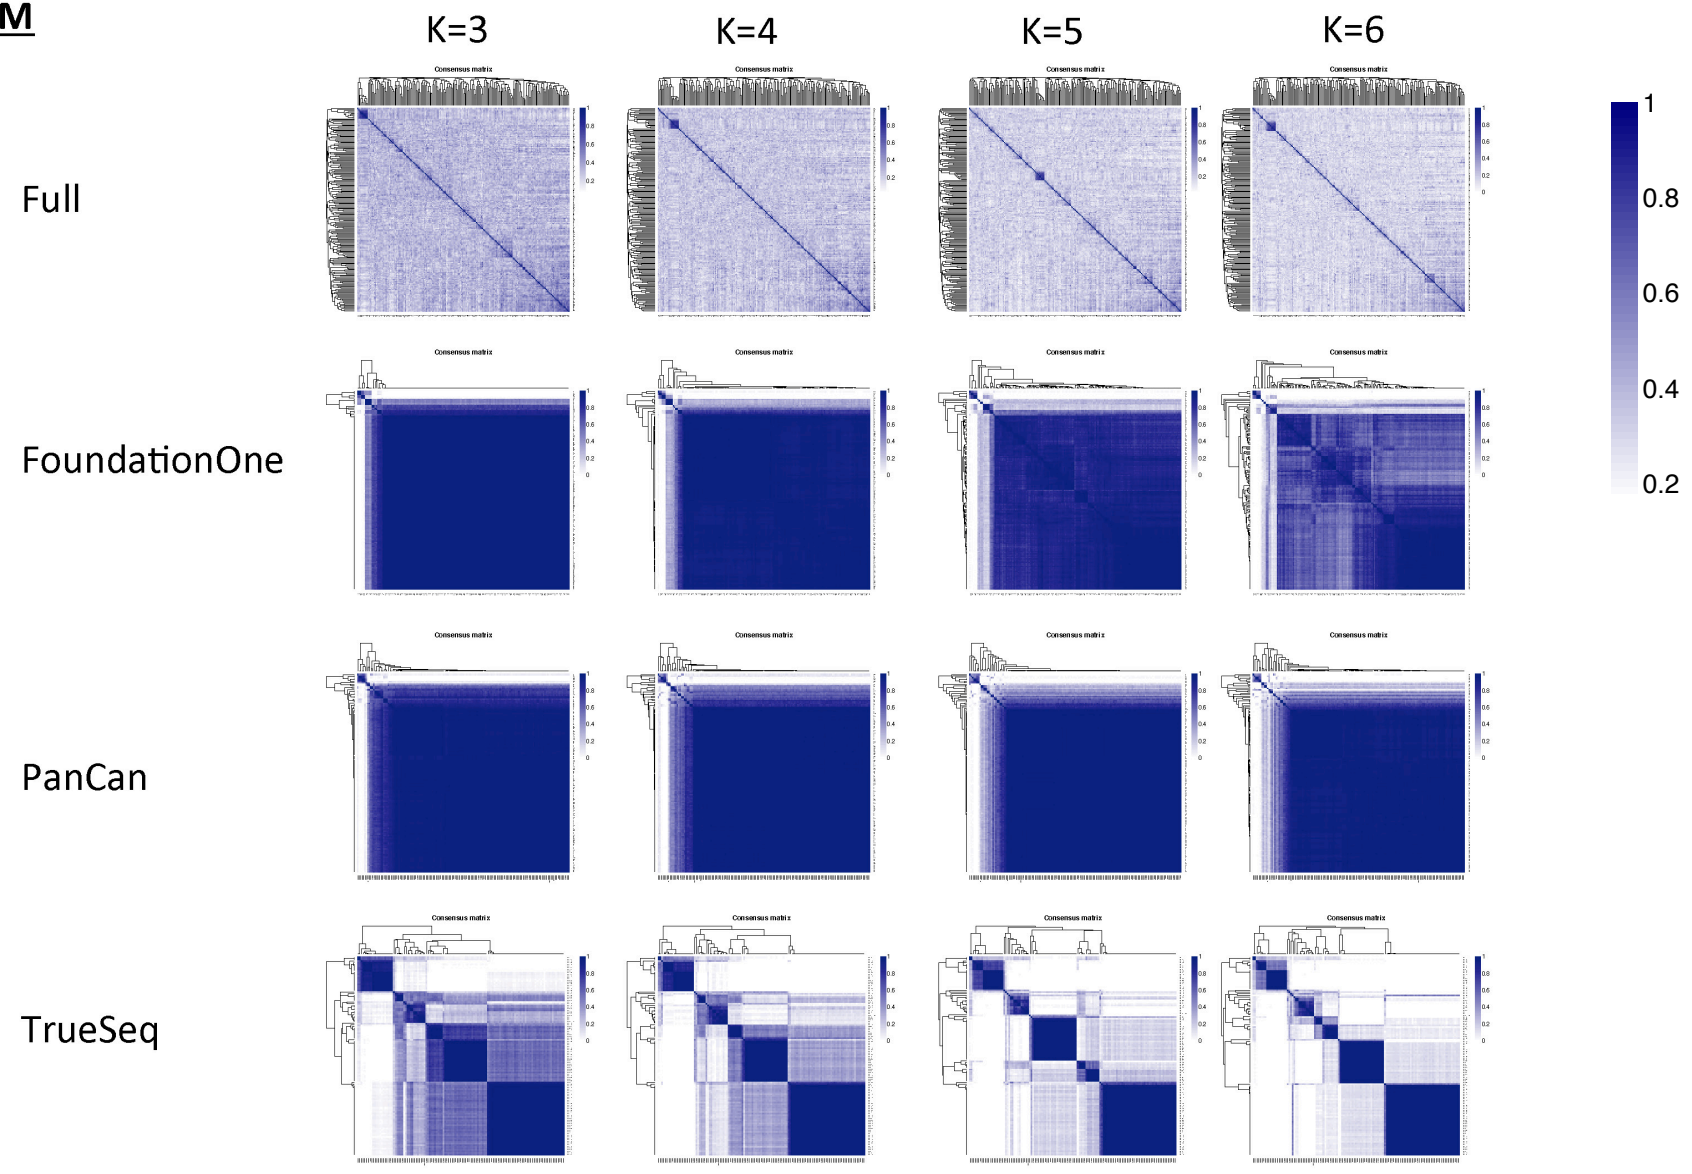

**Figure S11:** The clustering patterns of MM across the four gene sets (Full, FoundationOne, PanCan, and TrueSeq) and rank  $K=3,4,5,6$ .

OV

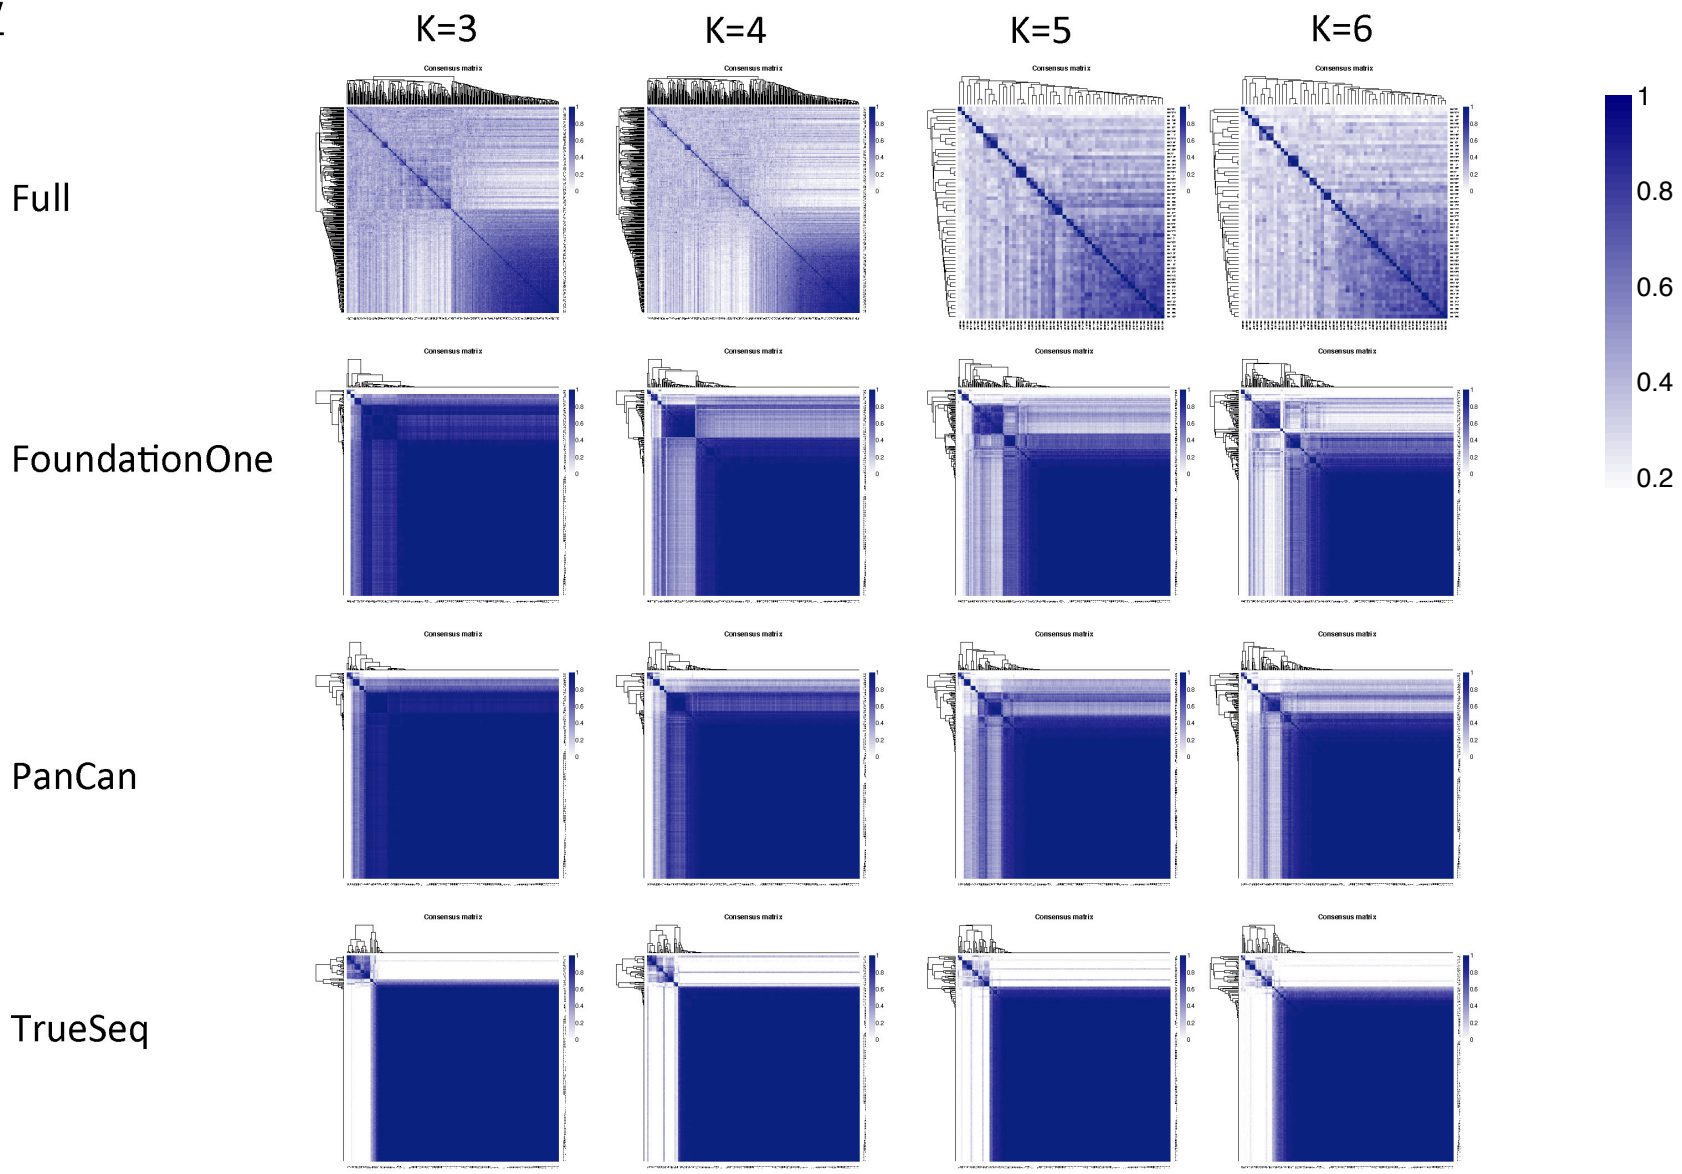

**Figure S12:** The clustering patterns of OV across the four gene sets (Full, FoundationOne, PanCan, and TrueSeq) and rank  $K=3,4,5,6$ .

# UCEC

Full

K=3

K=4

K=5

K=6

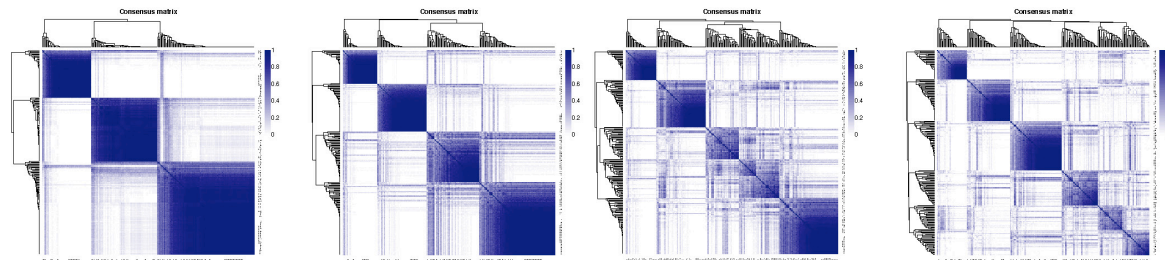

FoundationOne

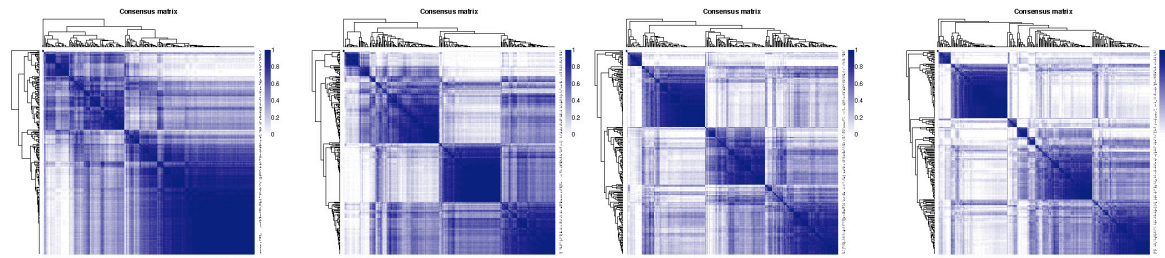

PanCan

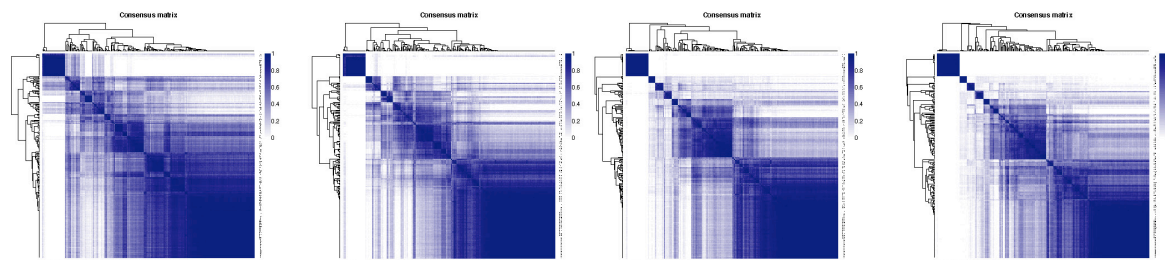

TrueSeq

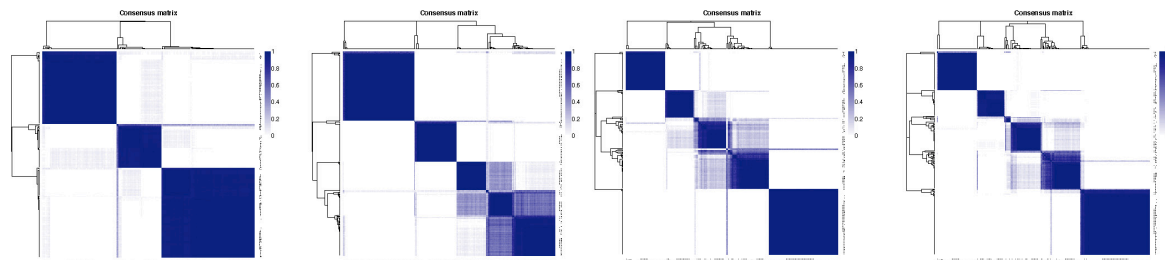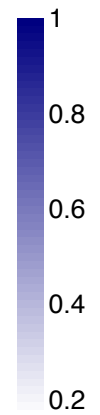

**Figure S13:** The clustering patterns of UCEC across the four gene sets (Full, FoundationOne, PanCan, and TrueSeq) and rank  $K=3,4,5,6$ .

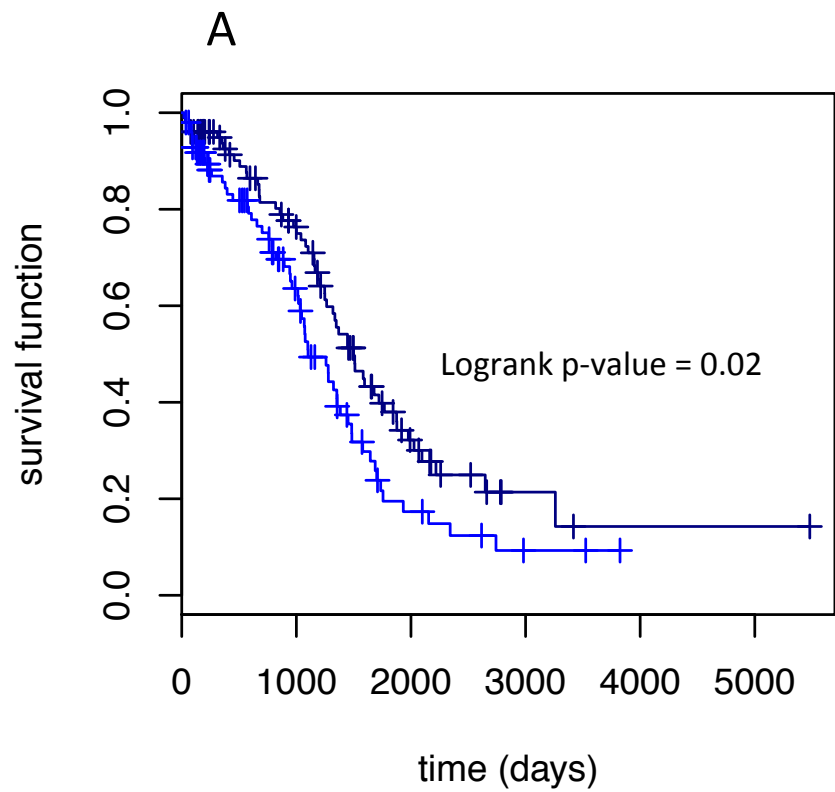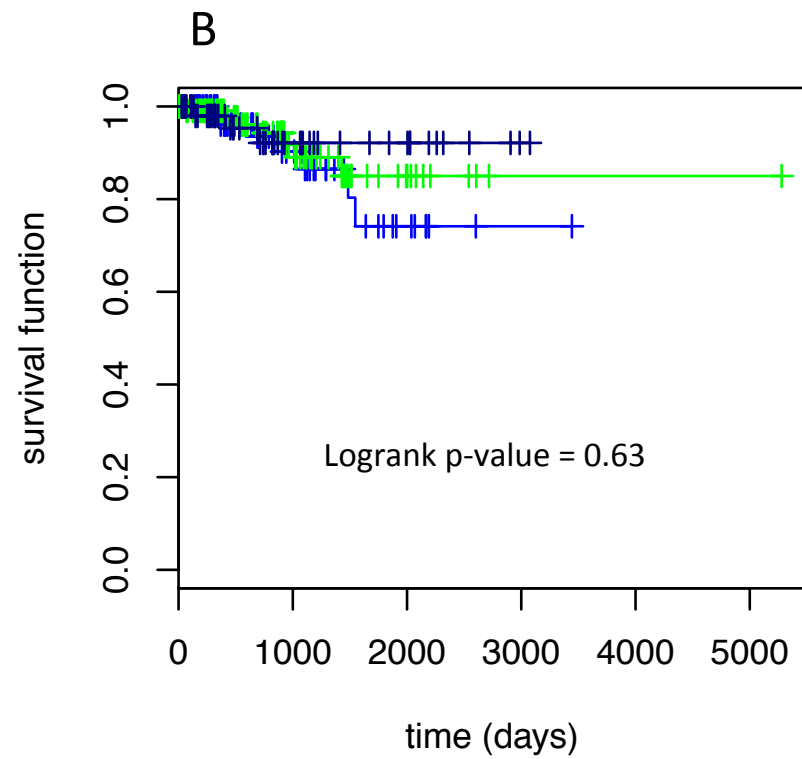

**Figure S14:** NBS subtypes using the Full dataset and the associations with survival for three cancers, OV (A) and UCEC (B).

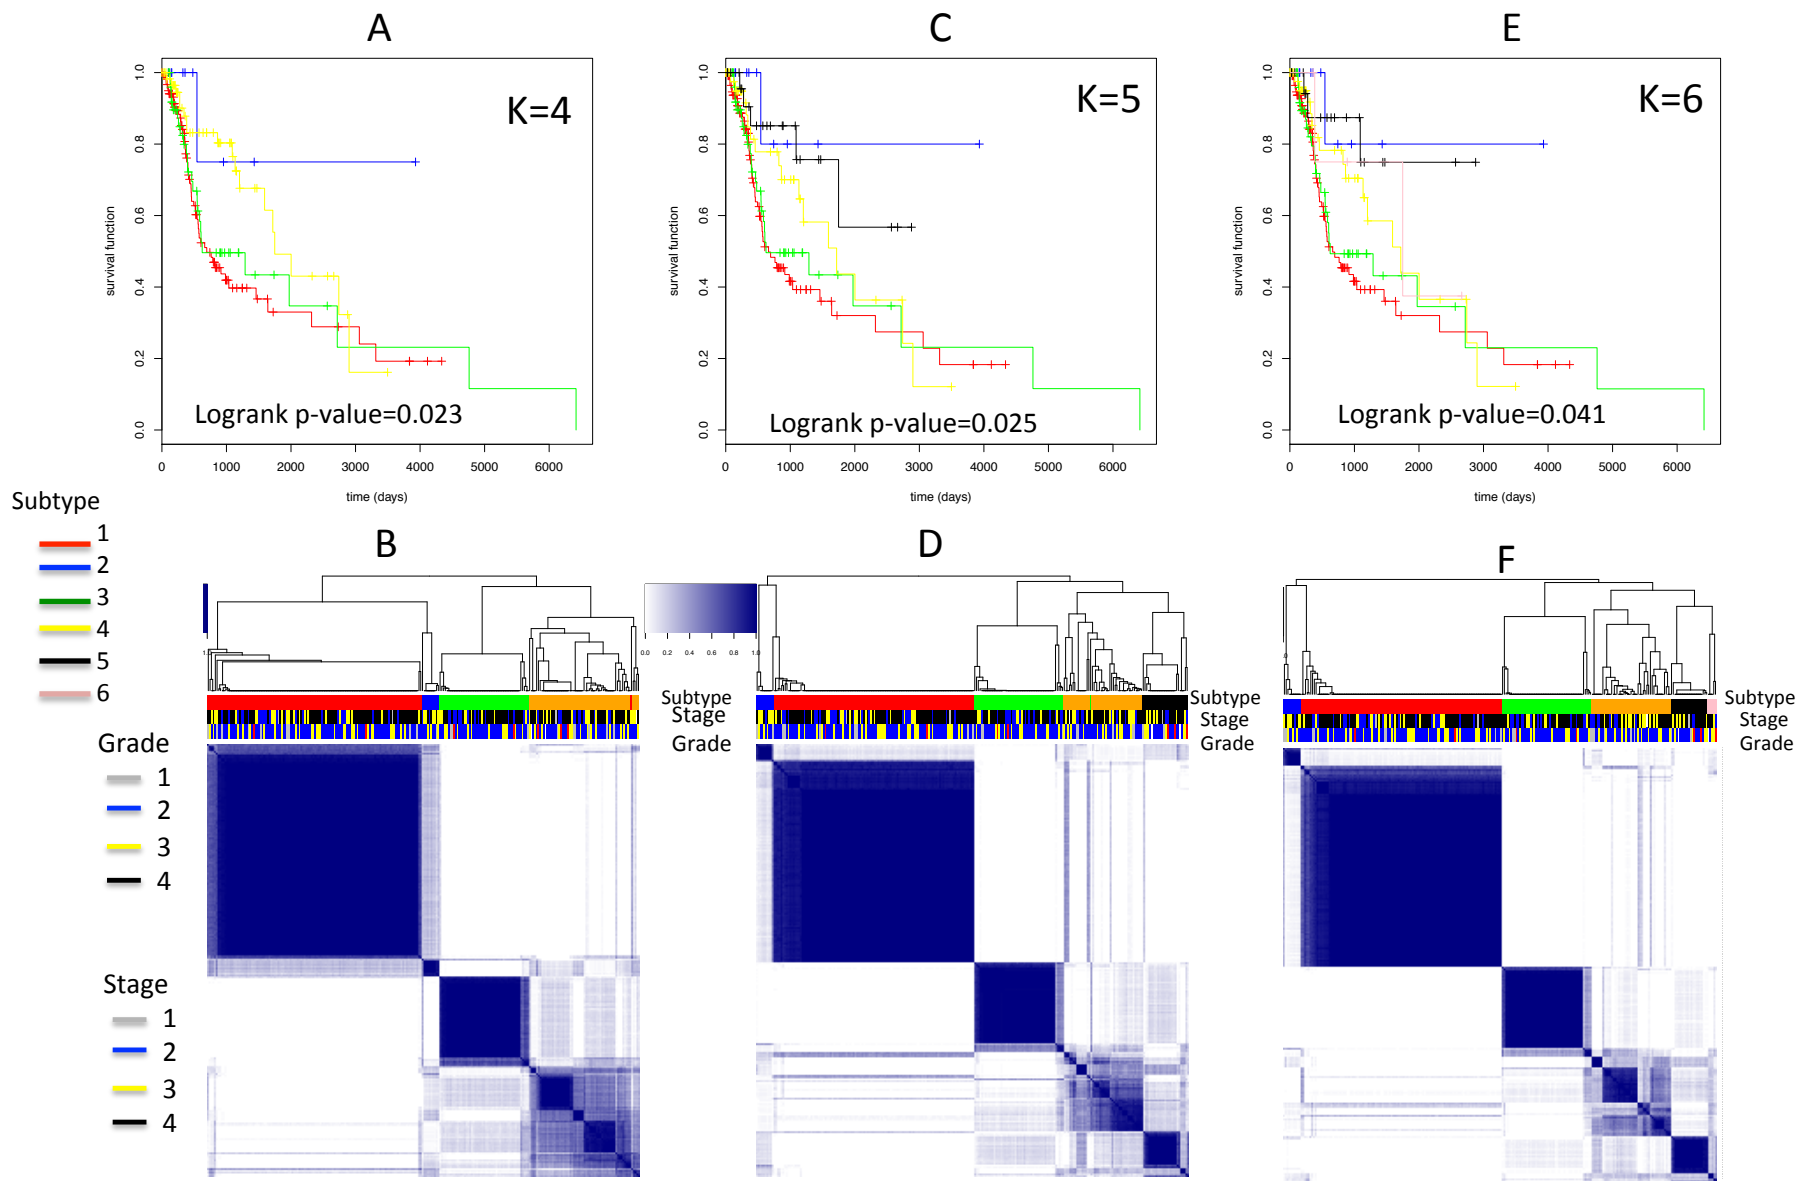

**Figure S15:** Subtypes associated with survival across different rank  $K$ 's for HNSC based on the TrueSeq panel. The sample subtype assignments for  $K=4,5,6$ , display an approximate nesting structure.



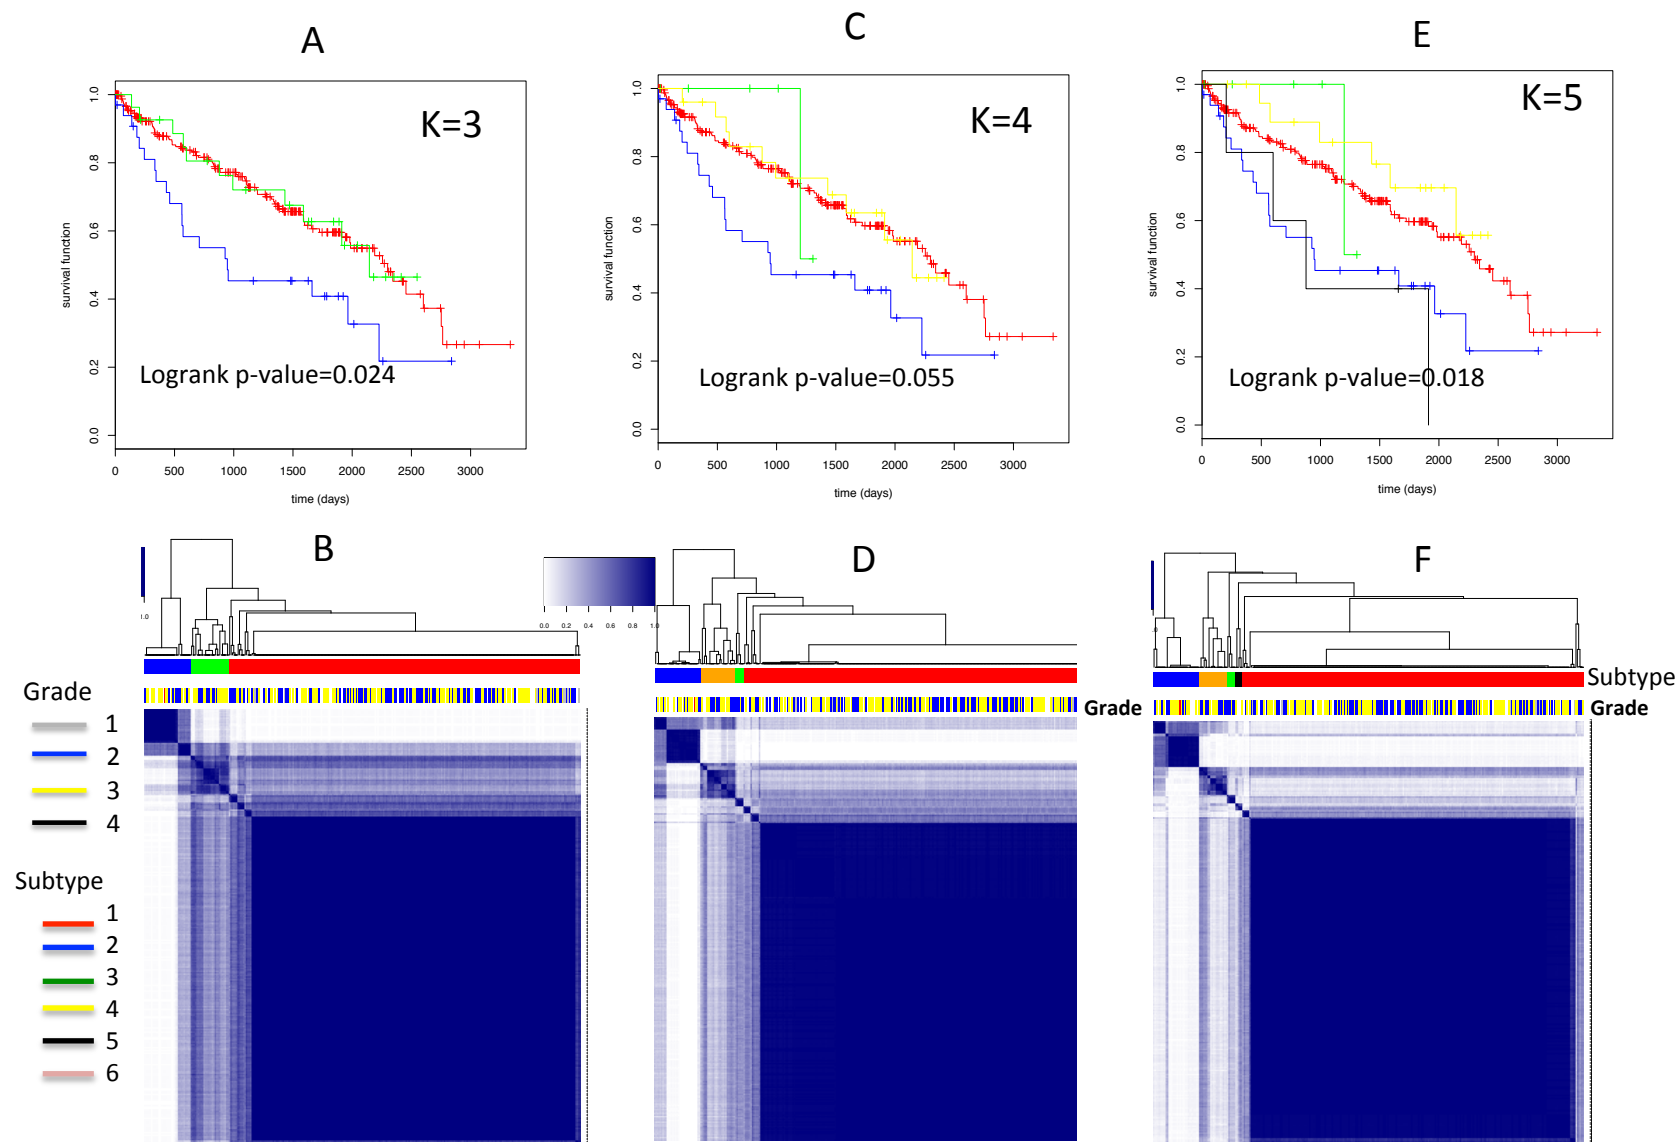

**Figure S16:** Subtypes associated with survival across different rank  $K$ 's for KIRC based on the PanCan panel. The sample subtype assignments for  $K=3,4,5$ , display an approximate nesting structure.

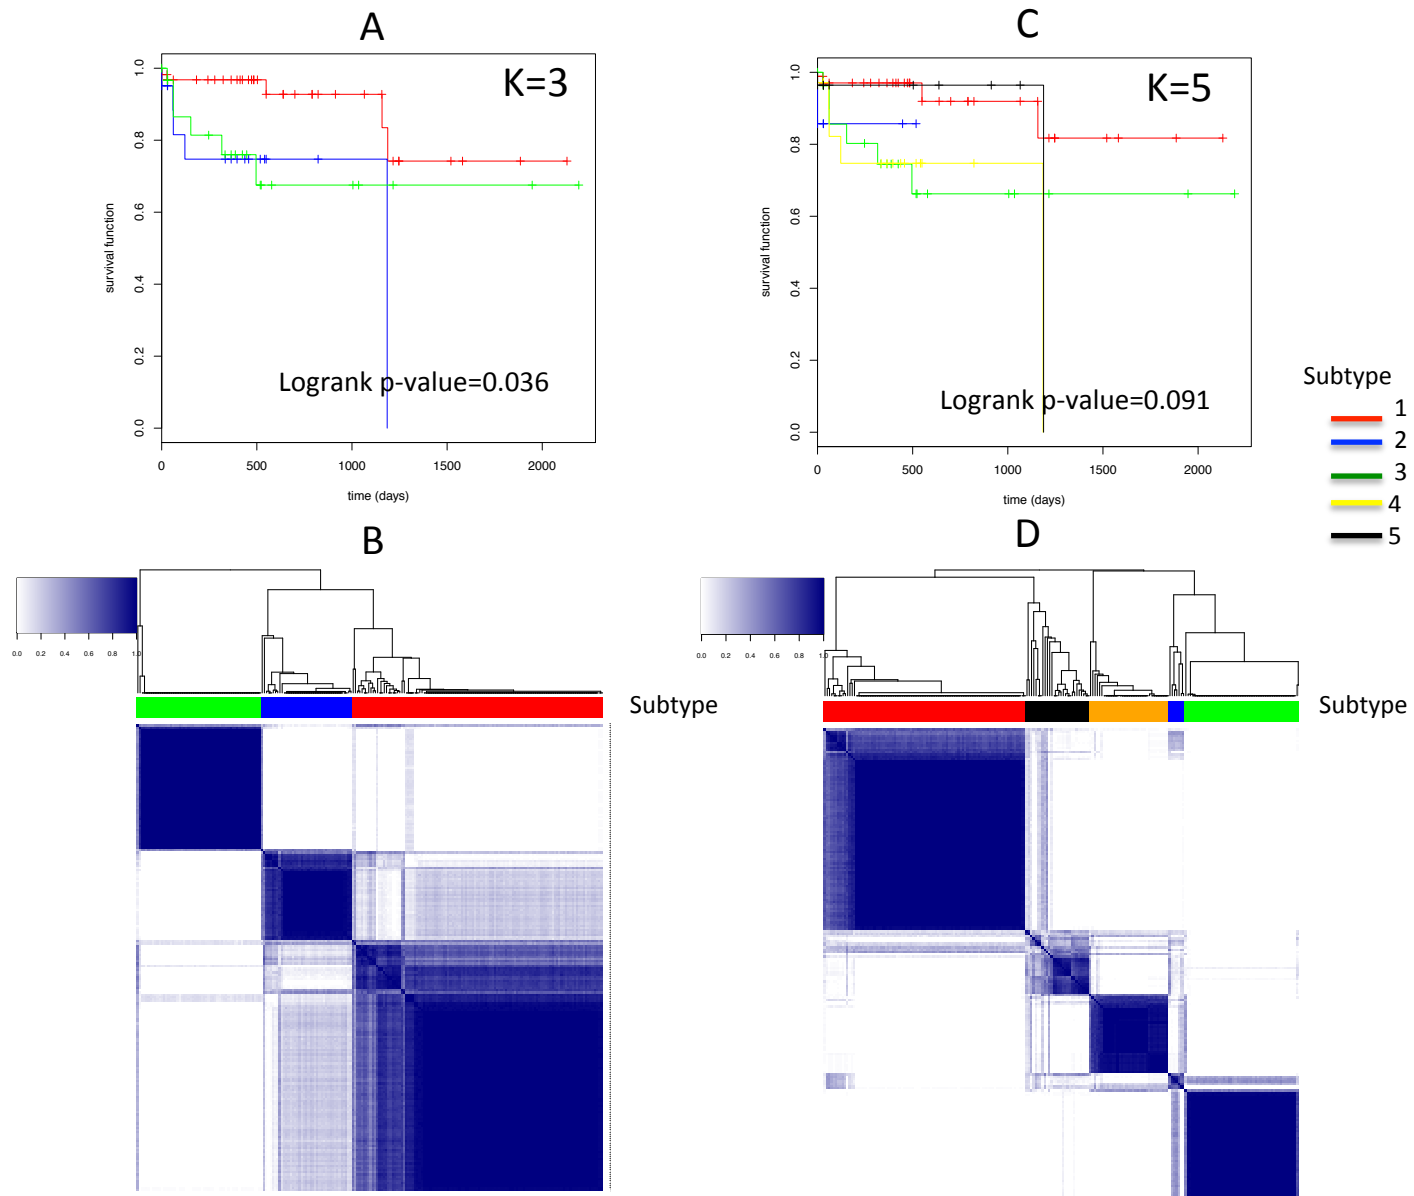

**Figure S17:** Subtypes associated with survival across different rank  $K$ 's for CRC based on the TrueSeq panel. The sample subtype assignments for  $K=3,5$ , display an approximate nesting structure.
